# Supplementary material for: Exploring the effect of supramolecular structures of micelles and cyclodextrins on fluorescence emission of local anesthetics
Source: Royal Society of Chemistry journal article supplement (doi:10.1039/c0pp00286k), 2010-12-24
Supplement: c0pp00286k.pdf [file c0pp00286k.pdf]

## Supporting Information

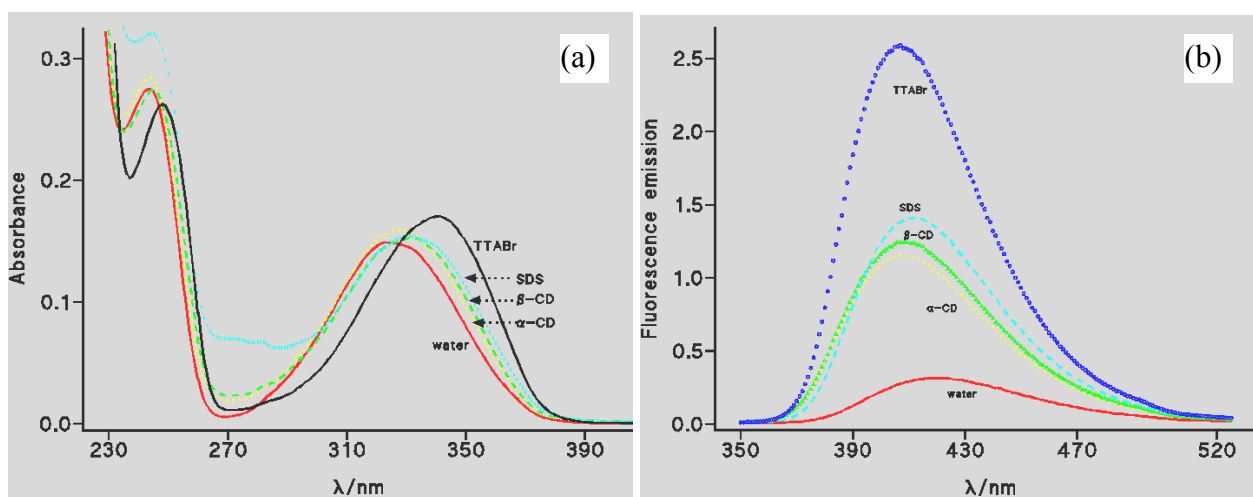

**Fig. S1.** (a) UV-vis absorption spectra of ethyl 2-aminobenzoate 25 μM dissolved in (red) water; (yellow) α-CD 0.030 M; (green) β-CD 7.0 mM; (blue) SDS 0.025 M and (black) TTABr 0.030 M; (b) Fluorescence emission of **2** dissolved in water, α-CD 0.030 M; β-CD 7.0 mM; SDS 0.025 M and TTABr 0.030 M; λ<sub>ex</sub> 335 nm; slits ex/em 4/2.

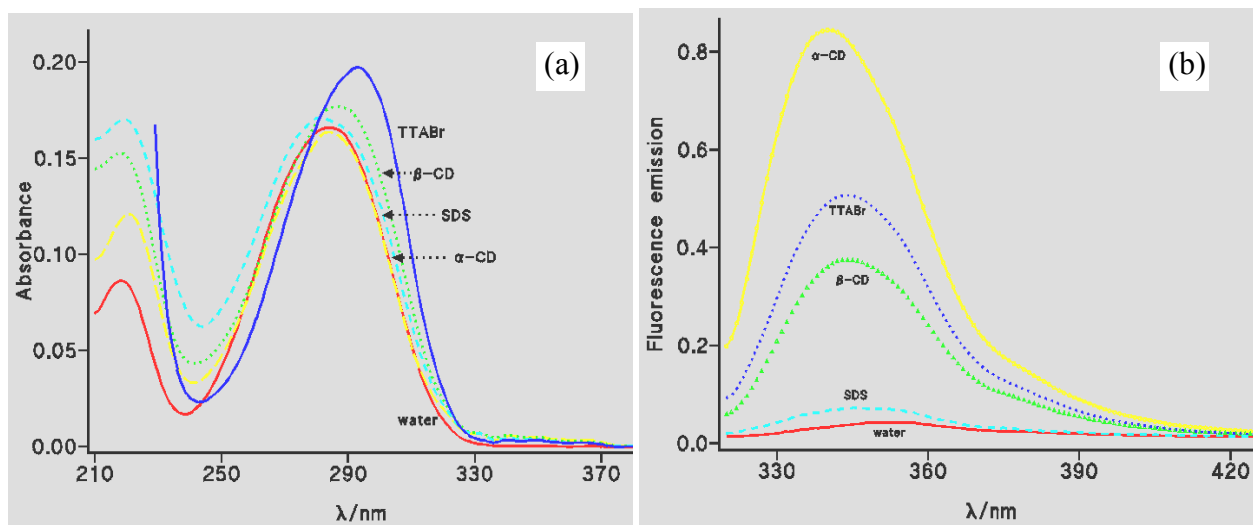

**Fig. S2.** (a) UV-vis absorption spectra of ethyl 4-aminobenzoate 12 μM dissolved in (red) water; (yellow) α-CD 0.030 M; (green) β-CD 7.0 mM; (cyan) SDS 0.025 M and (blue) TTABr 0.030 M; (b) Fluorescence emission of **4** dissolved in (red) water; (cyan) SDS 0.025 M; (yellow) α-CD 0.030 M; (green) β-CD 7.0 mM, and (blue) TTABr 0.030 M; λ<sub>ex</sub> 300 nm; slits ex/em 4/2.

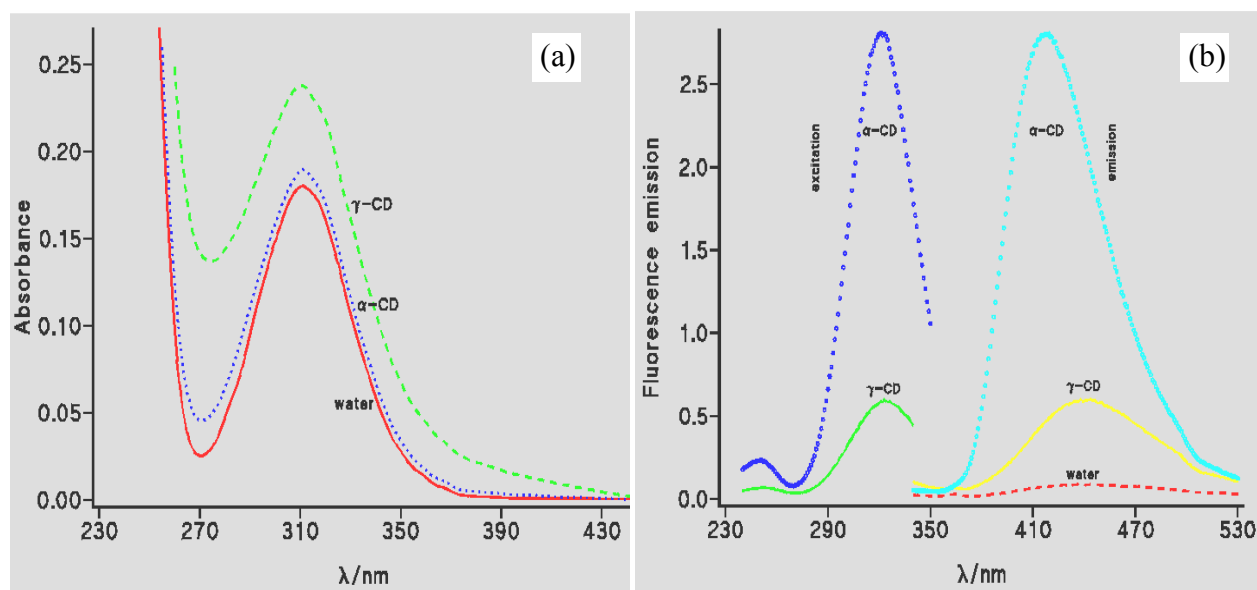

**Fig.S3.** (a)UV-vis absorption spectra of ethyl 3-aminobenzoate 65μM dissolved in (red)water; (blue)α-CD 0.050 M, and (green)γ-CD 0.060 M (the absorbance increase is the consequence of the light-scattering by the solvent); (b)Excitation en emission spectra of **3** dissolved in (---)water; (—)γ-CD 0.060 M, and (o)α-CD 0.050 M;  $\lambda_{ex}$  325 nm, slits ex/em 4/4.

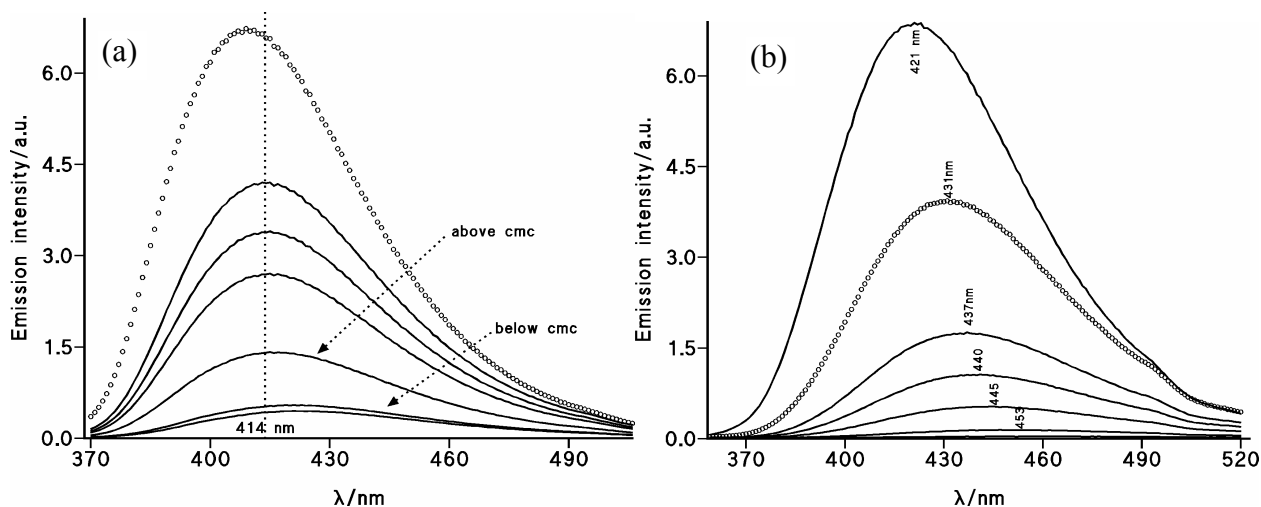

**Fig. S4.** (a)Spectra of (—)**2** in aqueous SDS micelles below (at [SDS]= 0 and 7.47 mM) and above the cmc (at [SDS]= 9.33, 14, 28 mM and 0.24 M following increase emission intensity maxima) and (o)in TTABr micelles of 0.24 M; (b)spectra of **3** in water (negligible intensity) and in aqueous-dioxane mixtures of %v/v dioxane equal to 16.7; 33.3; 42; 50; 63, and 83.3% following the increase of emission maxima and blue shift. Data in Table 2.

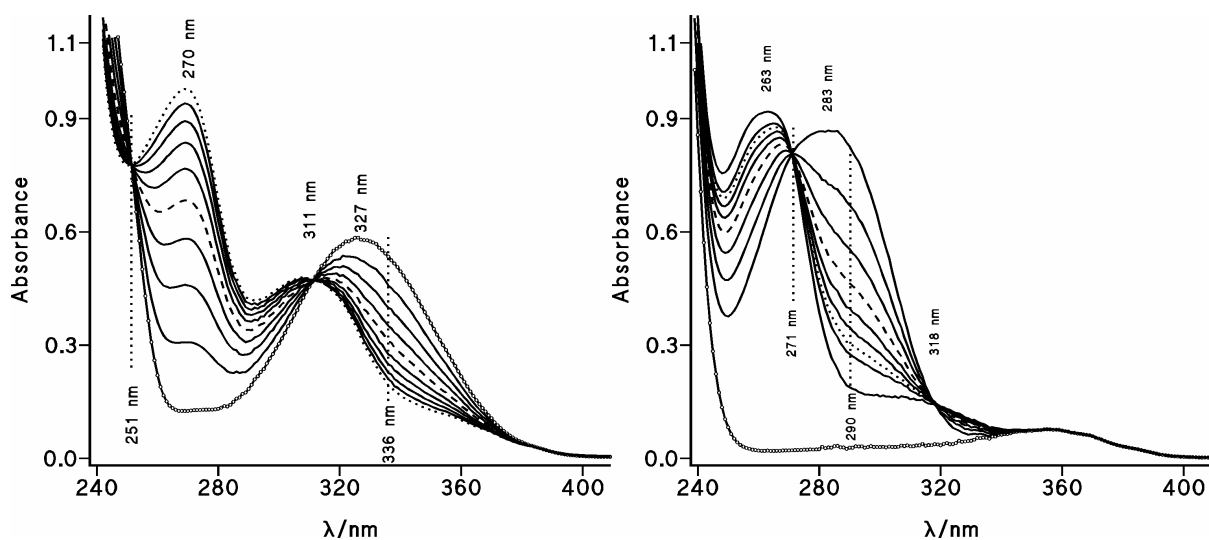

**Fig. S5.** Reaction spectrum for the nitrosation of (a)**2** and (b)**4** under the experimental conditions that appears in Table 5.

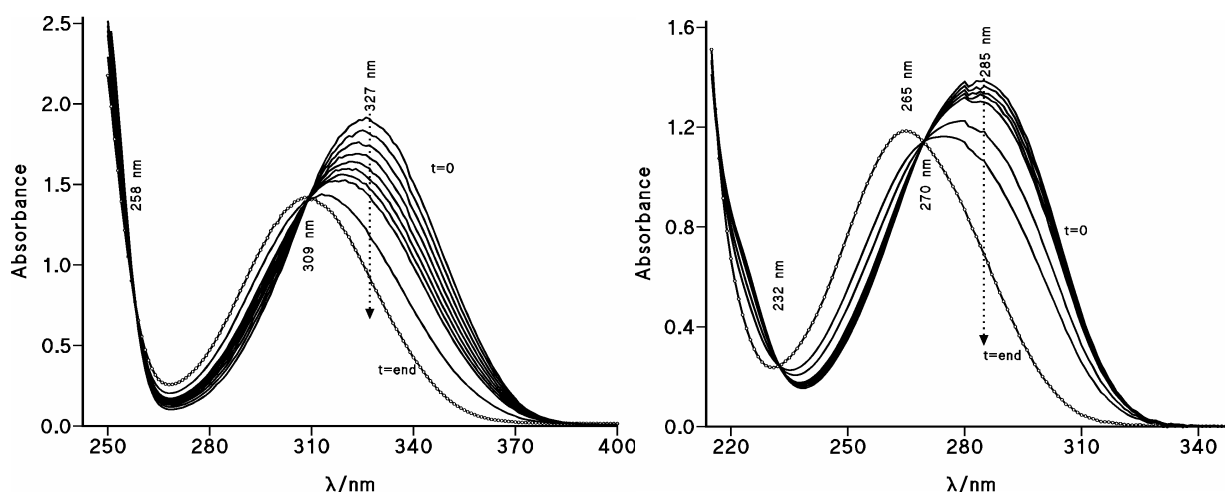

**Fig. S6** (a)Reaction spectra for basic hydrolysis of **2**; (b)reaction spectra for the basic hydrolysis of **4** . Experimental conditions in Table 6.

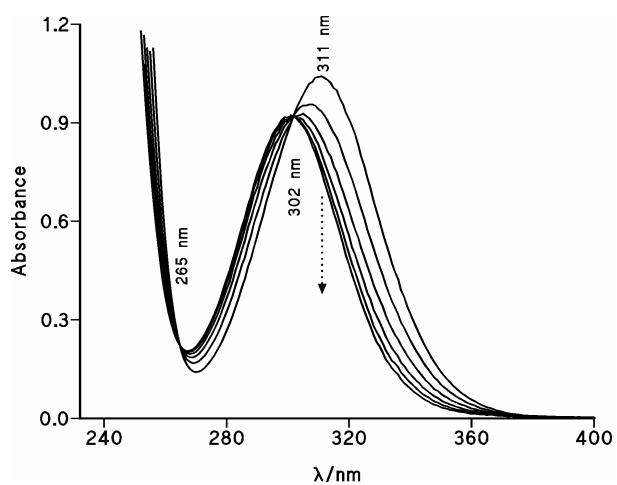

**Fig. S7.** Reaction spectra for the basic hydrolysis of **3**. Experimental conditions in Table 6
